# Supplementary material
Source: PubMed Central journal article supplement (PMC7434709)
Supplement: NIHMS1610890-supplement-1.pdf [file NIHMS1610890-supplement-1.pdf]

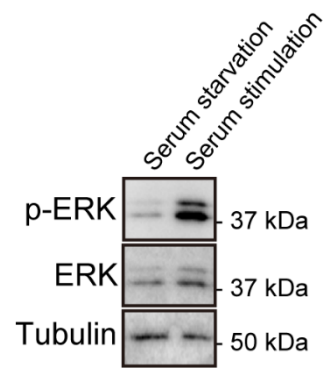

**Figure S1. pERK antibody validation**

C2C12 cells at 50% confluence were serum starved overnight (serum starvation), and then stimulated with 10% fetal bovine serum for 30 min (serum stimulation). Cells were lysed and subjected to western analysis.

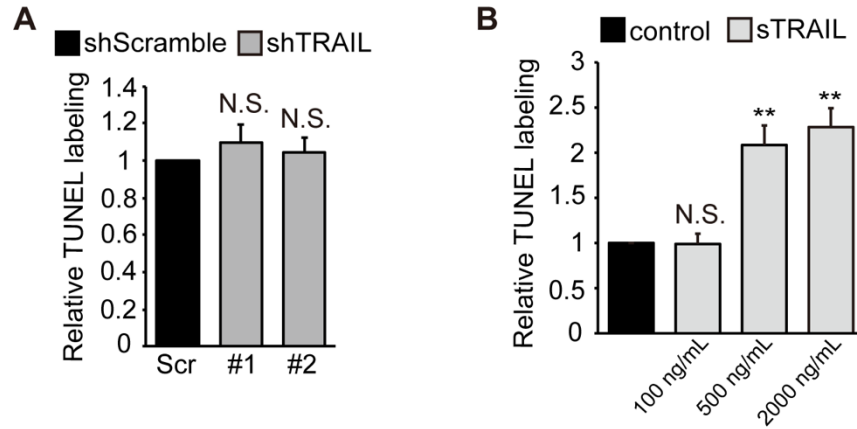

**Figure S2. TRAIL at high concentrations induces apoptosis in myocytes.**

(A) C2C12 cells were transduced with lentiviruses expressing shTRAIL or shScramble (Scr) followed by 2 days of puromycin selection. Cells were then induced to differentiate for 24 hrs, followed by TUNEL assay. Data were normalized to shScramble (n=4). (B) C2C12 cells were grown with vehicle (Control) or various concentrations of sTRAIL for 6 to 9 hours and induced to differentiate for 24 hrs in the presence or absence of sTRAIL, followed by TUNEL assay. Data were normalized to control (n=5). All error bars represent SEM. Two tailed *t*-test was performed to compare each data to control (first bar). NS: not significant ( $P > 0.05$ ). \*\*  $P < 0.01$ .
